# Supplementary material for: Synthesis and high-throughput testing of multilayered supported ionic liquid catalysts for the conversion of CO2 and epoxides into cyclic carbonates
Source: Royal Society of Chemistry journal article supplement (doi:10.1039/c3cy01000g), 2014-01-01
Supplement: c3cy01000g.pdf [file c3cy01000g.pdf]

## Synthesis and high-throughput testing of multilayered supported ionic liquid catalysts for the conversion of CO<sub>2</sub> and epoxides into cyclic carbonates

Paola Agrigento, Syed M. Al-Amsyar, Benjamin Sorée, Masoumeh Taherimehr, Michelangelo Gruttadauria, Carmela Aprile, Paolo P. Pescarmona

### Supporting Information

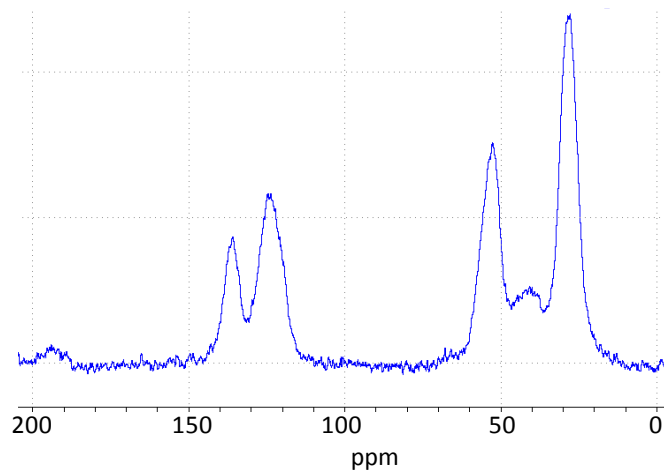

**Figure S1.** Solid state MAS <sup>13</sup>C NMR spectrum of Octane-I.

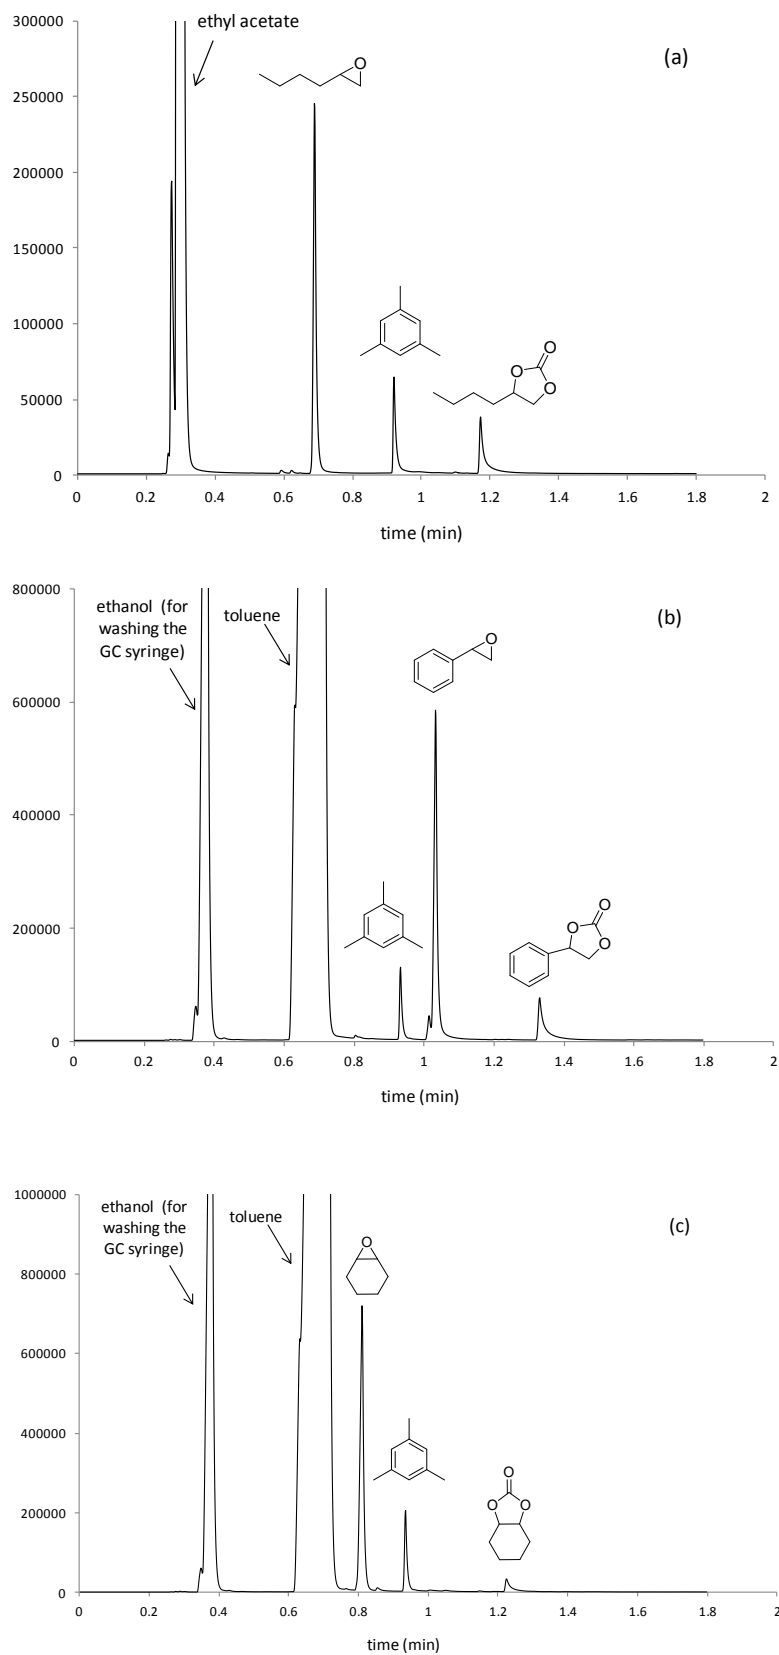

**Figure S2.** Representative chromatograms of the reaction solutions at the end of the catalytic tests. In all cases, mesitylene was employed as internal standard. A solvent (toluene or ethyl acetate) was added to dilute the samples. From top to bottom: (a) reaction of CO<sub>2</sub> with 1,2-epoxyhexane (entry 8 in Table 2); (b) reaction of CO<sub>2</sub> with styrene oxide (entry 6 in Table 3); (c) reaction of CO<sub>2</sub> with cyclohexene oxide (entry 4 in Table 4).

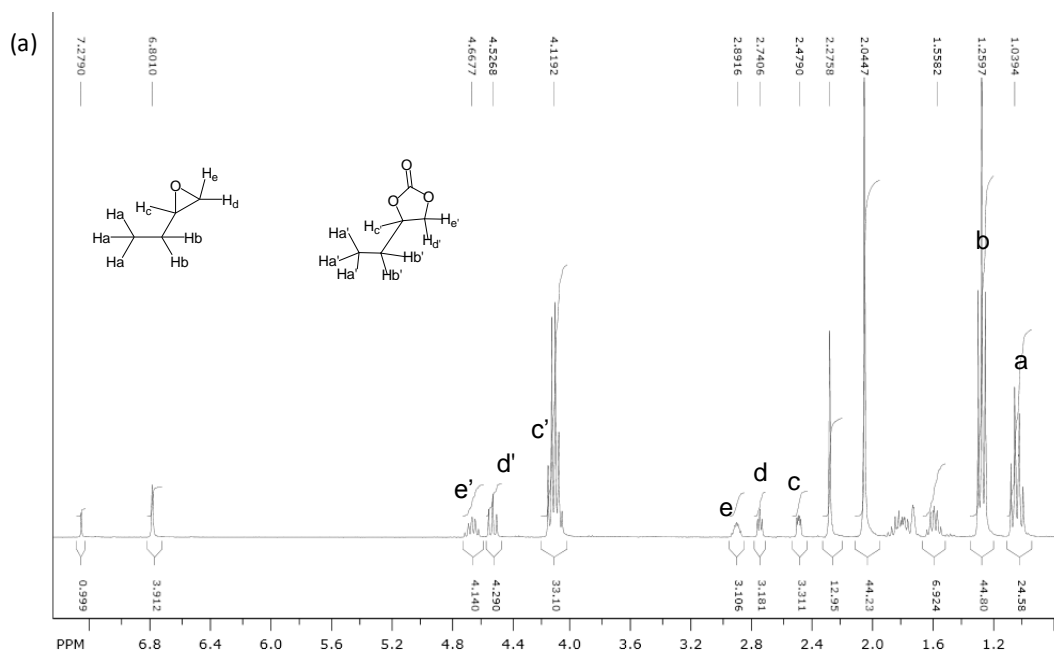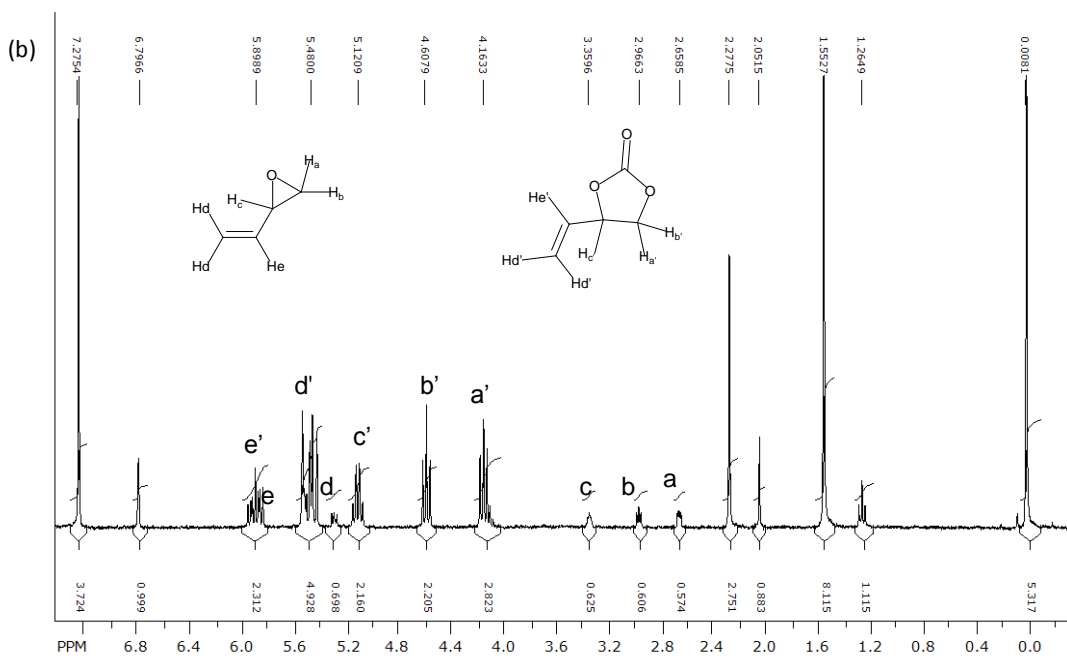

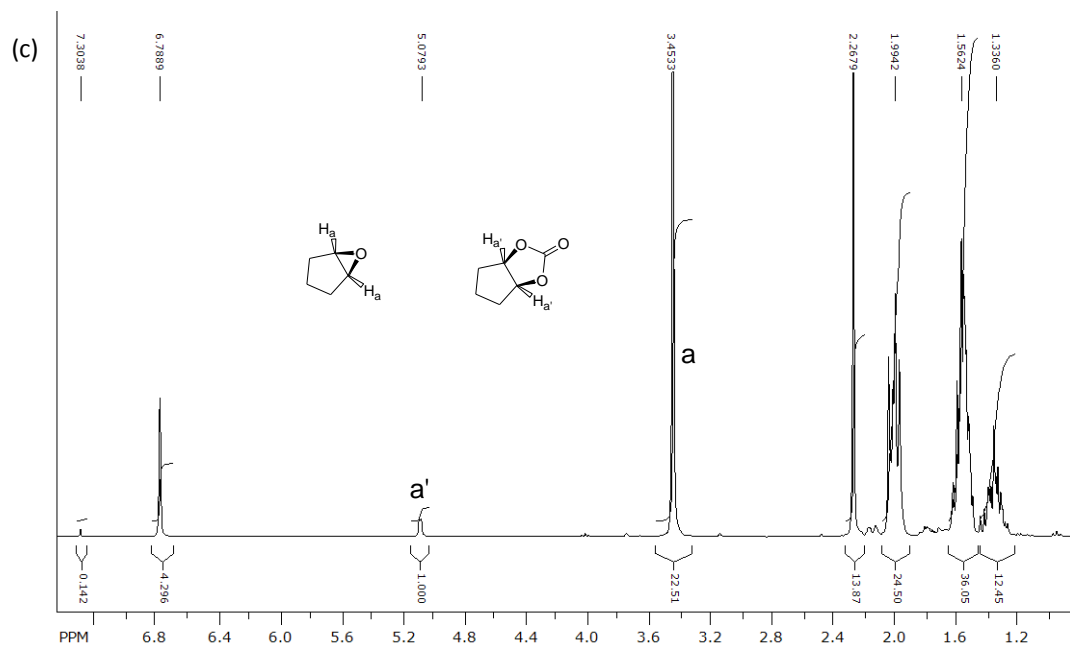

**Figure S3.** Representative  $^1\text{H}$  NMR spectra of the reaction solutions at the end of the catalytic tests. In all cases, mesitylene was employed as internal standard.  $\text{CDCl}_3$  was added to dilute the samples. From top to bottom: reaction of  $\text{CO}_2$  with 1,2-epoxybutane (entry 1 in Table 4); (b) reaction of  $\text{CO}_2$  with 1,2-epoxy-3-butene (entry 2 in Table 4); (c) reaction of  $\text{CO}_2$  with cyclopentene oxide (entry 3 in Table 4).

**Table S1.** Comparison between supported ionic-liquid catalysts for the cycloaddition of CO<sub>2</sub> to styrene oxide.

| Entry | Catalyst                                                                             | Catalyst amount as mol <sub>IL</sub> /mol <sub>epoxide</sub> (%) | Pressure (MPa) | Temp. (°C) | Time (h) | Yield (%) | TOF (h <sup>-1</sup> ) | Productivity (g <sub>carbonate</sub> /g <sub>catalyst</sub> ) | Ref.      |
|-------|--------------------------------------------------------------------------------------|------------------------------------------------------------------|----------------|------------|----------|-----------|------------------------|---------------------------------------------------------------|-----------|
| 1     | 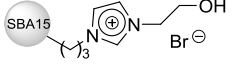    | 1.24                                                             | 2              | 120        | 2        | 99.6      | 40                     | 23                                                            | [19b]     |
| 2     |     | 1.6                                                              | 2.5            | 120        | 6        | 93        | 10                     | 31                                                            | [19d]     |
| 3     |     | 0.44                                                             | 2              | 140        | 4        | 99.5      | 56                     | 47                                                            | [16b]     |
| 4     |     | 0.68                                                             | 6              | 110        | 7        | 79        | 17                     | 19                                                            | [16a]     |
| 5     |     | 1                                                                | 2              | 110        | 3        | 80        | 27                     | 13                                                            | [6d]      |
| 6     | [C <sub>4</sub> -mim] <sup>+</sup> [BF <sub>4</sub> ] <sup>-</sup> /SiO <sub>2</sub> | 1.8                                                              | 8              | 160        | 4        | 92        | 51                     | -                                                             | [16c]     |
| 7     |   | 1                                                                | 5              | 140        | 3        | 25        | 25                     | 12                                                            | [19a]     |
| 8     |   | 0.65                                                             | 2              | 140        | 5        | 98.9      | 30                     | -                                                             | [19c]     |
| 9     | SBA-15- <i>p</i> -Xylene-Br-B (mlc-SILP)                                             | 1                                                                | 8              | 150        | 3        | 90        | 30                     | 45                                                            | [9]       |
| 10    | SiO <sub>2</sub> - <i>p</i> -Xylene-I (mlc-SILP)                                     | 0.42                                                             | 8              | 150        | 3        | 99        | 79                     | 76                                                            | this work |
| 11    | SiO <sub>2</sub> - <i>p</i> -Xylene-I (mlc-SILP)                                     | 0.42                                                             | 8              | 125        | 3        | 37        | 29                     | 28                                                            | this work |
| 12    | SiO <sub>2</sub> -Octane-I (mlc-SILP)                                                | 0.12                                                             | 8              | 150        | 3        | 45        | 127                    | 138                                                           | this work |

TOF: turnover frequency, defined as (mol<sub>epoxide converted</sub> / mol<sub>halide</sub>) / h.
